# Supplementary material for: Solvent cage effects: the influence of radical mass and volume on the recombination dynamics of radical cage pairs generated by photolysis of [CpCH2CH2N(CH3)C(O)(CH2)nCH3Mo(CO)3]2 (n = 3, 8, 13, 18) (Cp = η5-C5H4) complexes
Source: Royal Society of Chemistry journal article supplement (doi:10.1039/b709005f), 2007-11-29
Supplement: b709005f.pdf [file b709005f.pdf]

## Supplementary Information

Solvent Cage Effects: The Influence of Radical Mass and Volume on the Recombination Dynamics of Radical Cage Pairs Generated by Photolysis of  $[\text{CpCH}_2\text{CH}_2\text{N}(\text{CH}_3)\text{C}(\text{O})(\text{CH}_2)_n\text{CH}_3\text{Mo}(\text{CO})_3]_2$  ( $n = 3, 8, 13, 18$ ) ( $\text{Cp} = \eta^5\text{-C}_5\text{H}_4$ ) Complexes.

Alan B. Oelkers Erick J. Schutte and David R. Tyler\*

**Table S1** Kinetic parameters for the photolysis and geminate recombination of substituted molybdenum dimers

| Compound                               | $\tau_2$ / ps | $F_c$           | $k_c/10^{10} \text{ s}^{-1}$ | $k_d/10^{10} \text{ s}^{-1}$ |
|----------------------------------------|---------------|-----------------|------------------------------|------------------------------|
| $[\text{Cp}'\text{Mo}(\text{CO})_3]_2$ | $190 \pm 15$  | $0.48 \pm 0.01$ | $8.1 \pm 0.6$                | $8.1 \pm 0.9$                |
| <b>5</b>                               | $100 \pm 15$  | $0.42 \pm 0.02$ | $13 \pm 2$                   | $18 \pm 3$                   |
| <b>6</b>                               | $100 \pm 10$  | $0.55 \pm 0.03$ | $13 \pm 2$                   | $11 \pm 1$                   |
| <b>7</b>                               | $75 \pm 10$   | $0.44 \pm 0.01$ | $13 \pm 1$                   | $17 \pm 1$                   |
| <b>8</b>                               | $60 \pm 10$   | $0.43 \pm 0.02$ | $11 \pm 1$                   |                              |

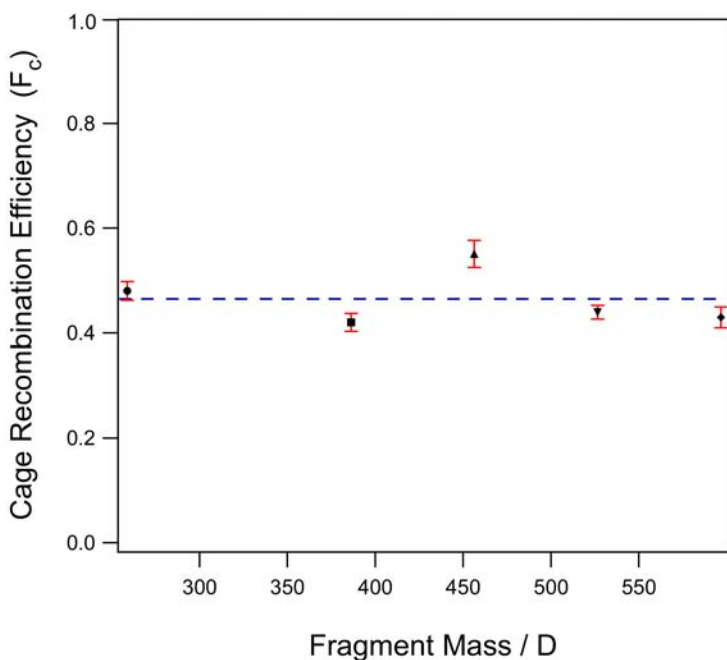

**Fig. S1** A comparison of the caging efficiency ( $F_{cP}$ ) vs. mass for the radical fragments created by photolysis of dimers **5** – **8** and  $[\text{Cp}'\text{Mo}(\text{CO})_3]_2$  in cyclohexane:  $\bullet$  =  $[\text{Cp}'\text{Mo}(\text{CO})_3]_2$ ,  $\blacksquare$  = **5**,  $\blacktriangle$  = **6**,  $\blacktriangledown$  = **7**,  $\blacklozenge$  = **8**. The error bars represent one standard deviation as determined from propagating the error generated from the least-squares non-linear regression fit of the kinetic traces (eqs 1 and 2). The dashed-blue line represents the mean value of the five data points,  $F_{cP} = 0.46$ .
